# Supplementary material
Source: PubMed Central journal article supplement (PMC1088678)
Supplement: PB010839s01.pdf [file PB010839s01.pdf]

These are electronic appendices to the paper by Eising *et al.* 2001 Maternal androgens in black-headed gull (*Larus ridibundus*) eggs: consequences for chick development. *Proc. R. Soc. Lond. B* **268**, 839–846.

Electronic appendices are refereed with the text. However, no attempt has been made to impose a uniform editorial style on the electronic appendices.

#### ELECTRONIC APPENDICES MS YOLK ANDROGENS AND CHICK DEVELOPMENT

##### Appendix A

Sample sizes for body mass in three chick nests.

| Age | A Oil | B Oil | C Oil | A H | B H | C H |
|-----|-------|-------|-------|-----|-----|-----|
| 0   |       | 1     | 4     |     | 2   | 12  |
| 1   | 4     | 12    | 17    | 4   | 18  | 18  |
| 2   | 11    | 17    | 8     | 20  | 18  | 14  |
| 3   | 17    | 12    | 11    | 16  | 16  | 14  |
| 4   | 11    | 11    | 2     | 11  | 14  | 10  |
| 5   | 10    | 5     | 6     | 11  | 6   | 5   |
| 6   | 7     | 5     | 2     | 7   | 8   | 6   |
| 7   | 3     | 2     | 4     | 4   | 3   | 5   |
| 8   | 2     | 3     | 1     | 4   | 6   | 5   |
| 9   | 5     | 3     | 3     | 5   | 3   | 3   |
| 10  | 2     | 4     | 3     | 3   | 6   | 3   |
| 11  | 4     | 4     | 4     | 5   | 1   | 2   |
| 12  | 2     | 4     | 3     | 2   | 2   | 1   |
| 13  | 5     | 4     | 4     | 2   | 2   | 3   |
| 14  | 4     | 3     | 3     | 2   | 4   | 4   |
| 15  | 4     | 2     | 4     | 3   | 3   | 3   |
| 16  | 5     | 5     | 3     | 3   | 3   | 2   |
| 17  | 3     | 3     | 5     | 2   | 2   | 1   |
| 18  | 5     | 6     | 4     | 2   | 3   | 3   |
| 19  | 4     | 2     | 3     | 2   | 3   | 2   |
| 20  | 4     | 4     | 2     | 2   | 4   | 3   |
| 21  | 3     | 2     | 4     | 2   | 3   | 3   |
| 22  | 1     | 2     | 2     | 3   | 1   | 3   |
| 23  | 4     | 3     | 3     | 3   | 3   | 2   |
| 24  | 3     | 3     | 1     | 4   | 2   | 2   |
| 25  | 3     | 2     | 3     | 1   | 1   | 1   |
| 26  |       | 1     | 1     | 2   | 2   | 1   |
| 27  | 4     | 3     | 2     | 2   | 2   | 1   |
| 28  | 1     | 1     | 1     | 1   | 3   | 1   |
| 29  | 1     | 1     | 1     | 2   | 2   | 1   |
| 30  | 2     | 3     | 1     | 1   | 2   | 1   |
| 31  | 1     | 1     | 2     | 2   |     |     |
| 32  | 1     | 1     | 2     | 1   |     |     |
| 33  |       |       |       | 1   | 2   | 1   |

Sample sizes for leg length in three chick nests.

| Age | A Oil | B Oil | C Oil | A H | B H | C H |
|-----|-------|-------|-------|-----|-----|-----|
| 0   |       | 1     | 4     |     | 2   | 12  |
| 1   | 4     | 12    | 19    | 4   | 18  | 19  |
| 2   | 12    | 18    | 8     | 20  | 19  | 14  |
| 3   | 19    | 13    | 11    | 17  | 15  | 10  |
| 4   | 12    | 11    | 2     | 14  | 10  | 7   |
| 5   | 10    | 6     | 7     | 11  | 6   | 6   |
| 6   | 8     | 5     | 1     | 8   | 8   | 7   |
| 7   | 3     | 1     | 3     | 4   | 4   | 4   |
| 8   | 2     | 3     | 1     | 5   | 6   | 5   |
| 9   | 3     | 1     | 3     | 4   | 2   | 3   |
| 10  | 2     | 4     | 3     | 3   | 6   | 3   |
| 11  | 4     | 3     | 2     | 5   | 1   | 2   |
| 12  | 1     | 3     | 2     | 2   | 2   | 1   |
| 13  | 5     | 3     | 1     | 2   | 2   | 2   |
| 14  | 2     |       | 1     | 1   | 3   | 2   |
| 15  | 1     |       | 1     | 2   | 1   | 2   |
| 16  | 2     | 1     | 1     | 1   | 1   | 1   |
| 17  |       |       |       | 1   | 1   | 1   |
| 18  | 1     |       |       |     |     | 1   |
| 19  |       |       |       | 1   | 1   | 2   |
| 20  |       |       |       | 1   |     | 3   |

ELECTRONIC APPENDICES MS YOLK ANDROGENS AND CHICK DEVELOPMENT

Appendix B

Output of the hierarchical linear model for body mass of three chick nests.

|                    |                           | Estimate | SE      | P     |
|--------------------|---------------------------|----------|---------|-------|
| <i>Null model</i>  |                           |          |         |       |
| Fixed              | Constant                  | 82.679   | 2.356   | 0.000 |
| Random             | Variance nest level       | 3689.786 | 202.351 |       |
|                    | Variance chick level      | 0        | 0       |       |
|                    | Variance individual level | 0        | 0       |       |
| Deviance           |                           | 7349.045 |         |       |
| <i>Basic model</i> |                           |          |         |       |
| Fixed              | Constant                  | 15.140   | 1.719   | 0.000 |
|                    | Age                       | 8.463    | 0.501   | 0.000 |
|                    | Age <sup>2</sup>          | 0.068    | 0.026   | 0.009 |
|                    | Variance nest level       | 365.07   | 20.021  |       |
|                    | Variance chick level      | 0        | 0       |       |
|                    | Variance individual level | 0        | 0       |       |
| Deviance           |                           | 5810.744 |         |       |
| <i>Final model</i> |                           |          |         |       |
| Fixed              | Constant                  | 14.716   | 1.856   | 0.000 |
|                    | Age                       | 8.155    | 0.481   | 0.000 |
|                    | Age <sup>2</sup>          | 0.083    | 0.025   | 0.001 |
|                    | Treatment                 | 2.105    | 1.424   | 0.139 |
|                    | Hatching order            | -10.503  | 1.273   | 0.000 |
|                    | Treatment* order          | 10.249   | 1.751   | 0.000 |
| Random             | Variance nest level       | 330.509  | 18.125  |       |
|                    | Variance chick level      | 0        | 0       |       |
|                    | Variance individual level | 0        | 0       |       |
| Deviance           |                           | 5744.615 |         |       |

Output of the hierarchical linear model for leg length of three chick nests.

|                    |                           | Estimate | SE    | <i>P</i> |
|--------------------|---------------------------|----------|-------|----------|
| <i>Null model</i>  |                           |          |       |          |
| Fixed              | Constant                  | 5.357    | 0.036 | 0.000    |
| Random             | Variance nest level       | 0.452    | 0.131 |          |
|                    | Variance chick level      | 0        | 0     |          |
|                    | Variance individual level | 0.236    | 0.125 |          |
| Deviance           |                           | 1321.726 |       |          |
| <i>Basic model</i> |                           |          |       |          |
| Fixed              | Constant                  | 4.3180   | 0.041 | 0.000    |
|                    | Age                       | 0.2430   | 0.016 | 0.000    |
|                    | Age <sup>2</sup>          | -0.003   | 0.001 | 0.003    |
|                    | Variance nest level       | 0        | 0     |          |
|                    | Variance chick level      | 0        | 0     |          |
|                    | Variance individual level | 0.139    | 0.008 |          |
| Deviance           |                           | 466.117  |       |          |
| <i>Final model</i> |                           |          |       |          |
| Fixed              | Constant                  | 4.365    | 0.043 | 0.000    |
|                    | Age                       | 0.222    | 0.016 | 0.000    |
|                    | Age <sup>2</sup>          | -0.001   | 0.001 | 0.317    |
|                    | Treatment                 | -0.007   | 0.031 | 0.825    |
|                    | Hatching order            | -0.217   | 0.029 | 0.000    |
|                    | Treatment* order          | 0.185    | 0.038 | 0.000    |
| Random             | Variance nest level       | 0        | 0     |          |
|                    | Variance chick level      | 0        | 0     |          |
|                    | Variance individual level | 0.126    | 0.008 |          |
| Deviance           |                           | 412.229  |       |          |
